# Supplementary material for: Novel Liver Stiffness-Based Nomogram for Predicting Hepatocellular Carcinoma Risk in Patients with Chronic Hepatitis B Virus Infection Initiating Antiviral Therapy
Source: MDPI journal article supplement (doi:10.3390/cancers13235892), 2021-11-23
Supplement: s1 [file cancers-1394915-supplementary.pdf › cancers-1394915-supplementary.pdf]

**Table S1.** Comparison of the baseline characteristics between the patients who developed HCC and those who did not.

| Variable                                     | Non-HCC<br>(n=1855, 91.1%) | HCC<br>(n=182, 8.9%) | p Value |
|----------------------------------------------|----------------------------|----------------------|---------|
| Age (years)                                  | 49 (39–56)                 | 55 (49–60)           | <0.001  |
| <40                                          | 464 (25.0)                 | 4 (2.2)              |         |
| 40–50                                        | 485 (26.1)                 | 46 (25.3)            |         |
| 50–60                                        | 600 (32.3)                 | 81 (44.5)            | <0.001  |
| 60–70                                        | 247 (13.3)                 | 42 (23.1)            |         |
| ≥70                                          | 59 (3.2)                   | 9 (4.9)              |         |
| Male sex                                     | 1,063 (57.3)               | 116 (63.7)           | 0.940   |
| Presence of cirrhosis                        | 851 (45.9)                 | 165 (90.7)           | <0.001  |
| HBeAg positivity                             | 936 (50.5)                 | 89 (48.9)            | 0.683   |
| TDF use (vs. ETV)                            | 1,030 (55.5)               | 90 (49.5)            | 0.116   |
| Liver stiffness value <sup>†</sup> (kPa)     | 7.2 (5.2–11.8)             | 13.9 (9.8–21.9)      | <0.001  |
| Laboratory test results                      |                            |                      |         |
| Platelet count ( $\times 10^3/\mu\text{L}$ ) | 172.5 (128.0–217.0)        | 122.0 (94.0–161.8)   | <0.001  |
| AST level (IU/L)                             | 43.0 (27.0–83.0)           | 50.0 (37.0–80.0)     | 0.582   |
| ALT level (IU/L)                             | 48.0 (25.0–115.0)          | 47.5 (30.0–84.3)     | <0.001  |
| Total bilirubin level (mg/dL)                | 0.8 (0.6–1.1)              | 0.9 (0.7–1.4)        | 0.061   |
| Serum albumin level (g/dL)                   | 4.2 (3.9–4.4)              | 4.0 (3.5–4.2)        | 0.019   |
| Prothrombin time level (INR)                 | 1.00 (0.95–1.07)           | 1.04 (0.99–1.14)     | <0.001  |
| Alpha-fetoprotein level (ng/mL)              | 3.81 (2.51–7.24)           | 6.89 (4.41–13.66)    | 0.324   |

Values are expressed as *n* (%) or median (interquartile range). <sup>†</sup>Measured using transient elastography (FibroScan®, EchoSens, Paris, France). HCC, hepatocellular carcinoma; TDF, tenofovir disoproxyl fumarate; ETV, entecavir; HBeAg (+), positive for hepatitis B e antigen; AST, aspartate aminotransferase; ALT, alanine aminotransferase; INR, international normalized ratio; HBV, hepatitis B virus.
